# Supplementary material
Source: publisher figshare collection journal article supplement (https://acs.figshare.com/ndownloader/files/4565698)
Supplement: Supplementary file 1 [file 4565698]

## Supporting Information

### Metallotectons: Comparison of Molecular Networks Built from Racemic and Enantiomerically Pure Tris(dipyrrinato)cobalt(III) Complexes

Shane G. Telfer<sup>\*a,b</sup> and James D. Wuest<sup>a</sup>

<sup>a</sup>*MacDiarmid Institute for Advanced Materials and Nanotechnology, Institute of Fundamental Sciences, Massey University, Private Bag 11 222, Palmerston North, New Zealand. E-mail: s.telfer@massey.ac.nz*

<sup>b</sup>*Département de Chimie, Université de Montréal, Montréal, Québec H3C 3J7, Canada*

#### Contents:

|                                         |             |
|-----------------------------------------|-------------|
| I. Solubility Tests.....                | Pages S1-S2 |
| II. X-Ray Crystallographic Details..... | Pages S2-S3 |

#### I. Solubility Tests

Triacid *rac*-**1a** (4.2 mg) was added to *N,N'*-diethylformamide (DEF) (75  $\mu$ L), and the resulting suspension was stirred vigorously at 20 °C for 4 h before being filtered through a 45  $\mu$ m nylon syringe filter. The saturated filtrate was diluted by adding 10  $\mu$ L to MeOH (20 mL). The absorption spectrum was recorded using a cell of 1 cm pathlength, giving  $A_{468\text{ nm}} = 1.0$ . Using a value of  $\epsilon_{468\text{ nm}} = 57,000\text{ M}^{-1}\text{cm}^{-1}$  gave a concentration of 18  $\mu$ M for the diluted solution, and 10  $\mu$ L of saturated solution therefore contains 0.37  $\mu$ mol of triacid *rac*-**1a**. This gave a concentration of a saturated solution of triacid *rac*-**1a** in DEF of 0.037 M.

The same procedure using enantiomerically pure triacid  $\Delta$ -**1a** (10 mg) gave a saturated solution in DEF with a concentration of 0.16 M.

## II. X-Ray Crystallographic Details

X-ray diffraction data were collected with Cu K $_{\alpha}$  radiation using a Bruker Smart 6000 CCD diffractometer equipped with an FR591 rotating anode generator. The structures were solved by direct methods using SHELXS-97 and refined with SHELXL-97.<sup>1</sup> All non-hydrogen atoms were refined anisotropically, except where noted below. Hydrogen atoms were placed in ideal positions and refined as riding atoms, except for those of certain guest molecules, where they were not included in the model (see below).

The percentage of volume accessible to guests was estimated by the PLATON program.<sup>2</sup> PLATON calculates the accessible volume by allowing a spherical probe of variable radius to roll over the van der Waals surface of the network. PLATON uses a default value of 1.20 Å for the radius of the probe, which is an appropriate model for small guests such as water.

### Refinement Details

**Complex *rac*-1a.** The included molecules of H<sub>2</sub>O (O100 – O103) are disordered over several sites. Their O atoms were refined anisotropically, and their H atoms were excluded in the model.

**Complex *rac*-1c.** The S atoms of two of the included molecules of DMSO proved to be disordered over two positions (S501/S502 and S201/S202). O801 corresponds to an included

molecule of H<sub>2</sub>O with half occupancy. The H atoms of this molecule were not included in the model.

**Complex *rac*-1d.** The included molecule of CH<sub>2</sub>Cl<sub>2</sub> was found to be disordered over two positions in a 70/30 ratio. The H atoms of this molecule were not included in the model.

### ORTEP View of the Structure of Trinitrile **Λ**-1b

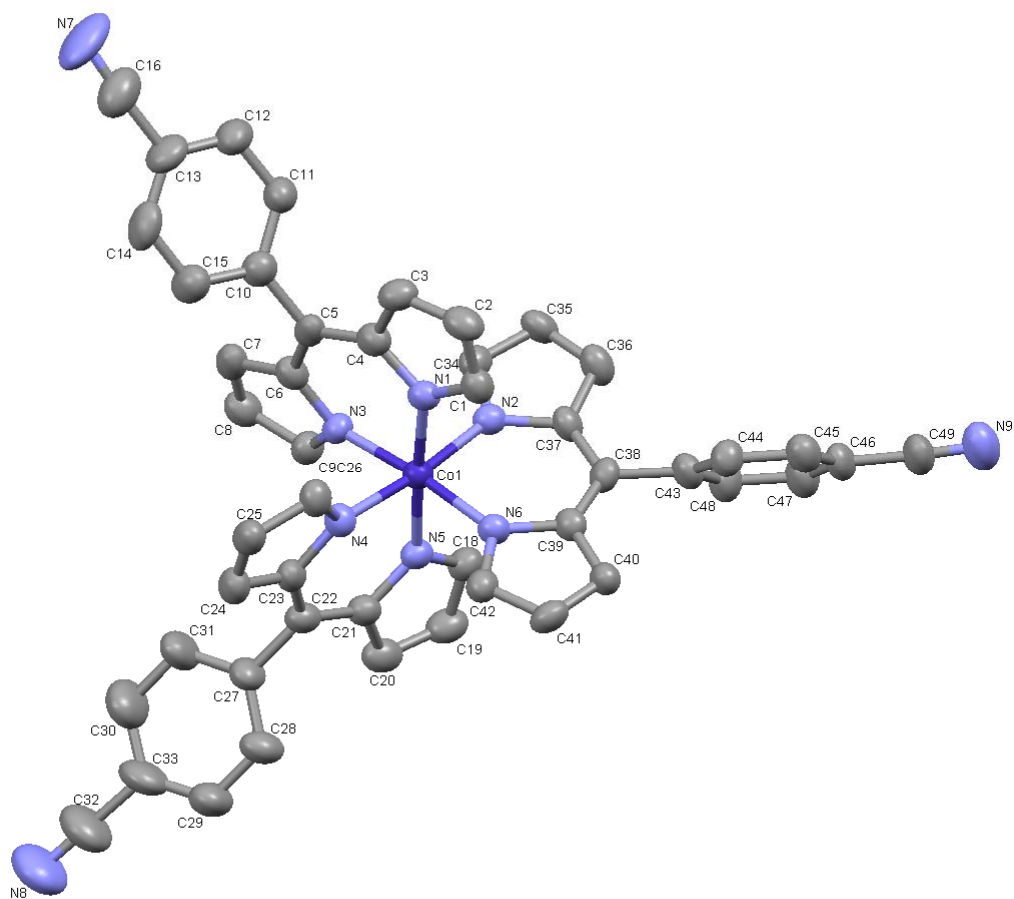

**Figure S1.** ORTEP view of the molecular structure of trinitrile **Λ**-1b in crystals grown from CHCl<sub>3</sub>/pentane, showing the numbering scheme. Hydrogen atoms are omitted for clarity. Thermal ellipsoids are shown at the 50% level.

## References

1. Sheldrick, G. M. SHELXS-97, *Program for the Solution of Crystal Structures* and SHELXL-97, *Program for the Refinement of Crystal Structures*; Universität Göttingen: Germany, 1997.
2. Spek, A. L. *PLATON*, A Multipurpose Crystallographic Tool; Utrecht University: Utrecht, The Netherlands, 2001. van der Sluis, P.; Spek, A. L. *Acta Crystallogr.* **1990**, *A46*, 194.
